# Supplementary material
Source: PubMed Central journal article supplement (PMC11668258)
Supplement: NIHMS2037868-supplement-1.pdf [file NIHMS2037868-supplement-1.pdf]

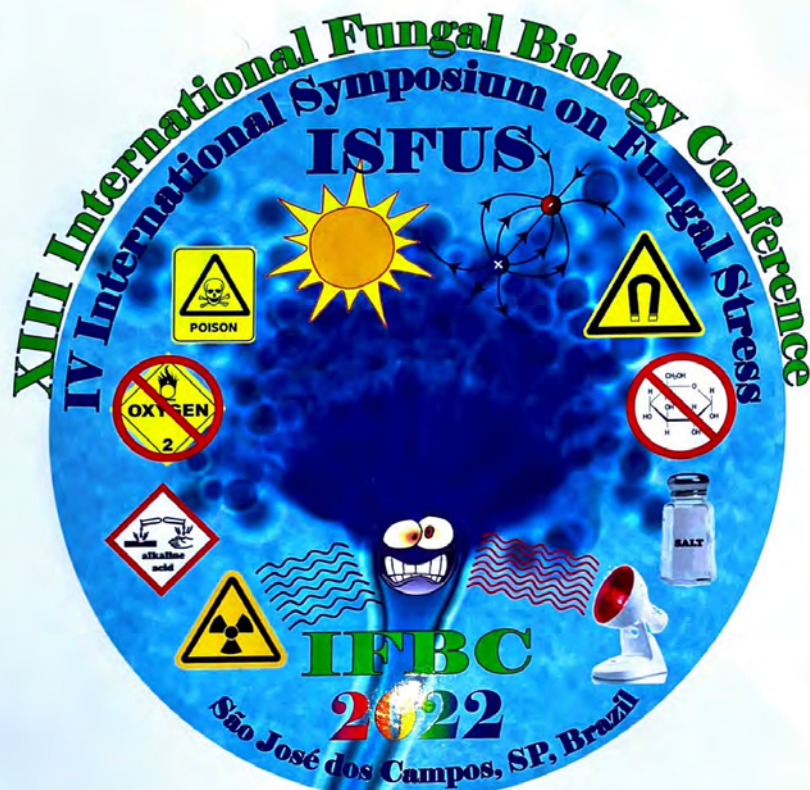

**Hotel Nacional Inn**  
**September 25 - 29, 2022**

**Funding**

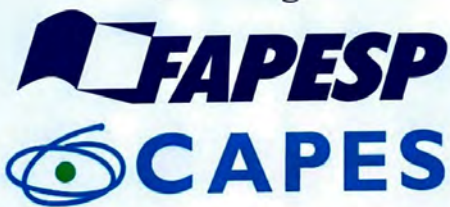

<https://isfus2022.wordpress.com>

Being a farmers daughter to working on farmers problem  
Journey has been incredible ----

Dear Drauzio, Alene and Amanda ... Thank you for  
the opportunity, hospitality .... My first visit to Brazil, 1st interna-  
-tional conference .. you guys made it very special. As a budding  
scientist i got to learn a lot.

Thank you Drauzio once again  
- Bhagy C. Thimmappa

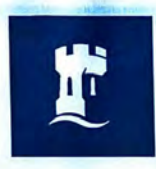

University of  
Nottingham  
UK | CHINA | MALAYSIA

Thanks Drauzio and Alene for your amazing  
organisation of ISFUS 2022. It has been a privilege  
to participate in this very special meeting. There  
is a different 'feel' compared with other conferences  
which you should definitely preserve, as it creates  
a great atmosphere for science as well as for  
making new friends. Thank you for all your  
hard work to achieve this and for including me.

Simon Avery, University of Nottingham,  
UK.

Dear Alene and Drauzio,

Many thanks for your warm welcome  
and your help with our visit.

With the best,

Martine and Rob.

45  
QUERIDOS DRAUZIO Y ALENÉ  
ESTOY MUY AGRADECIDA POR EL ENORME ESFUERZO  
QUE HAN HECHO PARA ORGANIZAR ESTE "JOINT  
MEETINGS" EN MEDIO DE TODAS LAS ADVERSIDADES,  
SERÁ TODO UN ÉXITO.

ON BEHALF OF THE INTERNATIONAL FUNGAL BIOLOGY  
CONFERENCE STEERING COMMITTEE AND MYSELF.

JESÚS AGUIRRE LINARES  
MÉXICO.

DRAZI DRAUZIO,  
HVALA ZA PRIJAZNO SRB IN VSO ČUSTVENO PODPORO  
KONGRESU IN PREDAVATELSTVEM. TO JE V DANESNJEJ SVETU  
REDKO IN TOLIKO BOLJ DRAGOCENO.  
NINA GUNDE-CIMERMAN, SLOVENIA.

Dear Drauzio,

You make my first trip to Brazil very special. Thank you for your  
hospitality, for sharing your personal scientific journey, & for hosting such  
a wonderful conference full of exciting science. 谢谢

Xiaorong Lin (林晓蓉)

Drauzio Alencar and Amanda

Your hospitality is beyond my reach. Your warm  
greetings and generous spirit have lifted my spirits.  
Thank you and thank you again.

Those of us who love fungi, also love to talk with  
other people who love fungi. The ISFMS venue is  
the perfect setting to engage your passion.

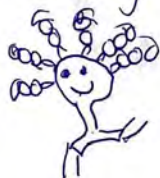

Fungi can be a lot of fun!

" Jon Wrenston Bennett  
USA

Drauzio, Alene e colaboradores

Eu gostaria de agradecer a todos pela possibilidade de participar de um ~~evento~~ evento tão enriquecedor e por me fazerem parte dele. Tem sido uma experiência imigualável.

Contem comigo em São!

Ama

P.S.: Obrigada por tudo, professor! O senhor fará falta :)

28/09/2022

Dear Drauzio, Alene, Amanda & all collaborators,

Thank you very much for your hospitality & endurance!  
This conference seemed to be difficult after the Covid 19 pandemic,  
but you made it possible.

It has been great to be here and enjoy science and the company  
of everyone. Thank so much!  
¡Felicidades y mil gracias!



Gracias por toda su amabilidad y organizar este  
evento tan interesante. Espero algún día verlos  
en México y regresarles un poco de su amabi-  
lidad.

Un Abrazo fuerte

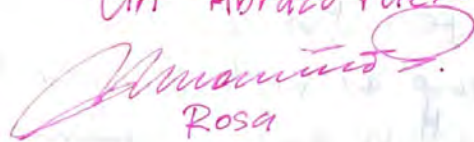

Rosa

Drauzio and Alene,

Thank you very much for your hospitality  
and kindness!

Abraço fraterno

Alexandre Bilze

Alene and Amanda -

Wonderful meeting, thank you so much  
for invitation and support & bring such interesting  
and lovely group of fungal biologists!

Nancy Keller

Parabéns pelo evento! Muito legal e ótimas palestras!  
Selle D. Kowes Brazil

Parabéns pela dedicação, empenho e amor aos  
fungos. Eu e meu alunos estamos muito felizes  
em participar deste evento.

Alvaro Gustavo Yvon

Thank you Drauzio, Alene, & Amanda for such a wonderful  
time of science, fungi, fairy circles, positive thoughts, & caipirinhas!  
What a fun time it has been getting to know you better &  
seeing inspirational science.

Thank you, Audrey Gadd

Dear Drauzio

Thank you so much for getting me to ISFUS and  
Brazil again. It's such a great meeting, perfect  
size and super international. Your enthusiasm for fungal  
biology is outstanding as well as your dedication to the  
conference organization and communication! Thanks also  
to Alene and Amanda for all their help.

Cheers!! Geoff Gadd

Thanks- Drauzio for such an amazing time spent here in Science. Organization was great also nice one.  
 → Evans Lyamu.

Benvolgut Drauzio,

Moltes gràcies per organitzar aquest congrés. Ha sigut molt enriquidor. Molt èxit en futurs esdeveniments.  
 Una abraçada Meritxell

Liebe Alene, lieber Drauzio,  
 vielen Dank für alle Eure Hilfe, und für Eure Good friendship  
 Carl Grieser Michael

Thank you so much for this wonderful event. I learnt alot!  
 Adam Crockett (UK)

Hi Alene and Drauzio,  
 thank you very much for the great conference and see you soon in Austria.  
 Philipp

Drauzio, Alene e Amanda,  
 Agradeço a oportunidade em participar da edição 2022 do ISFUS e IFBC. Vocês conseguiram reunir palestrantes de considerável importância no estudo de fungos. Obrigada, também, pela hospitalidade e acolhimento. Desejo ânimo para a organização de muitas outras edições desse simpósio muito importante para a área!  
 Abraços, Muelle Garcia UFG

So one day I came here alone  
But that's not the way I'm going home

I came here for science and knowledge and expertise  
Not exactly knowing what I'm about to find  
A sapling midst the tallest trees  
Longing for a glimpse of the light so bright

But rain and sunlight made the sapling grow  
And the wind made it resilient  
Because in this garden of trees there lies a soul  
The soul so kind and so brilliant

The tall ones share what they've created  
Their wisdom of all the seasons they've seen  
The saplings, meanwhile, companionship they sought  
And the trees, as they looked, they also agreed

But now it is late, and that's how it ends  
The short story of the sapling in the south  
A story of growth and sharing, of teachers and friends  
And that is what this gathering was all about

Because the sapling came here alone  
But that's not how the young tree is going home

and your lovely ladies  
(Aline & Amanda) and  
your lovely students for  
this organization

Thank you so much Drauzio for giving me the opportunity to meet you  
and all these wonderful people!

Hope to see you soon (in Muskruck?)

Edward W-Lewand  
(It was so terrific)

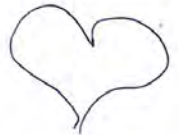

With love from Vienna  
Dadine

Professor  
Thank you for the great  
meet

for the great  
stress!  
John & Rosine

Thanks for everything  
Susanna, Barbara + Gerhart

Prof. Diavolo,  
CONGRATIS - YOU ARE MY Special Reference

THANKS FOR EVERYTHING!  
MAGNO

So, so happy to be here sharing this special moment with all of you!

Thank you all for your hard work, dedication and love!

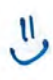

XoXo,

Ana Carolina B. Padua  
29/09/2021

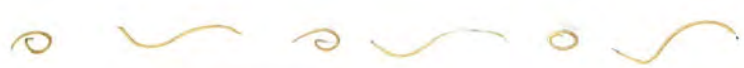



14  
EU APENAS GOSTARIA DE AGRADECER A COMISSÃO ORGANIZADORA,  
PELO PRESENTE QUE FOI ESTE EVENTO. FOI MUITO MAIS DO  
QUE EU ESPERAVA! UMA OPORTUNIDADE INCRÍVEL, TANTO  
NO ÂMBITO PROFISSIONAL, QUANTO PESSOAL!  
JÁ AGUARDO ANSIOSAMENTE A PRÓXIMA EDIÇÃO!

ABAÇOS,

ISABELA AMATTO  
29/09/22

GREAT SPEAKER SELECTION!

LOTS OF LEARNING AND TOP NOTCH SCIENCE UPDATES!  
CONGRATS TO THE ORGANIZING COMMITTEE!

Cheers!

TRENATO MONTAGNOLI  
(29/09/2022)

Nathalia Gonçalves da Rosa Gonzo  
29/09/2022

Parabéns pelo evento, eu gostei muito de todos os trabalhos apresentados  
e a forma como tudo foi organizado! Muito obrigado, sucesso para todos!

September 29th, 2022

Lucas Silva Lima 29/09/2022

Dear Drauzio, Alene, and Amanda,

It has been extolled that: "Life at its best is an adventure."  
Thank you for sharing your adventure with all of us in welcoming  
the largest genetics community to Brazil again and again.  
Your enthusiasm and hospitality are boundless!

Best  
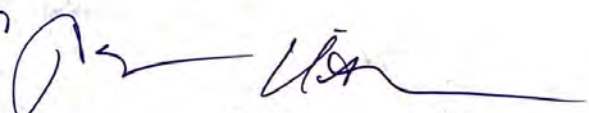

THANK YOU FOR INSIGHTFUL AND GREAT SYMPOSIUM! ALL THE BEST, MAX.

29 de Setembro 2022

Evento maravilhoso, excelentes palestras e pesquisadores de todo o mundo!  
 Gratia de agradecer toda comissão organizadora pelo evento de alto nível e tão acolhedor!  
 Parabéns!

Natália Sayuri Wassano

29.09.2022

Dear Drauzio,  
 Thank you so much for organizing  
 this amazing meeting and giving  
 me a reason to spend my first  
 time in Brazil. I really enjoyed  
 the nice selection of fungal biology  
 themes and had very nice exchange  
 with many people.

Uli Terpitz

29.09.2022

Querido Drauzio,  
 Parabéns pelo maravilhoso e produtivo evento.  
 Foi uma ótima oportunidade de aprendizagem.

Obrigado

Pamela  
 Carmo

ICT - UNESP - SJ

29/09/2022

Drauzio,

Parabéns pelo evento! Palestrantes, pesquisadores, colegas com conteúdos enriquecedores.  
 Ótima oportunidade de aprendizado. Espero estar presente na próxima!

Thank you, Lívia Siqueira Godri Unesp/SJC.

Drauzio,

Deixo aqui o meu agradecimento por este evento brilhante, capaz de reunir tantas mentes brilhantes com temáticas tão distintas, mas estimulantes.

Precisamos de profissionais assim!

Obrigada

Luana Körber

29/09/22

Prof. Drauzio

Simpósio excelente, as palestras foram muito interessantes. Espero que novos surtos!! Os fungos são uma panaceia para muitos!!

Duzala

Abraço

Ana Flávia Vasconcelos

FCI - UNESP - Presidente Prudente - SP

Prof. Drauzio,

Parabéns pelo excelente evento! Foi uma experiência única graças a você. Desejo muito sucesso! Até a próxima!

Abraço,

Maura Sugaí-Guérios

Universidade Positivo - PR

Sept 29th 2022.

Dear Drauzio,

Thankya so much for inviting me to your fantastic conference. I have made so many new friends & learnt new things - a perfect experience.

I hope our paths cross again,

All best wishes for your new science adventures

Jan Quinn.

Amei o evento e adorei  
 conhecer a você, a sua maravilhosa  
 família e seu filho especial ISFUS!  
 Muito obrigada!

Gracias!

Karla

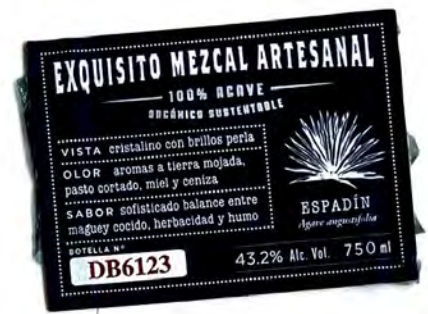

Dear Prof. Drauzio, Alene & Amanda,  
 Meda moase bebree wo nea mmaaye  
 ama me. Onyankopon n'nyira mo  
 Emma me. Me da mmo nyinaa.  
 Darling Amanda - klabeye menua afebaa!  
 Meda wo afebaa!

Mo ba Mavis Acheampong,  
~~09/10/2022~~ 09/10/2022

Dear Prof. Drauzio, Alene & Amanda,  
 Thank you so much for everything  
 you have done for me. God bless  
 you for me. I Love You All!  
 Darling Amanda - You are my sister forever  
 I love you forever!

Your daughter Mavis Acheampong  
~~09/10/2022~~ 09/10/2022  
 Ghana!

Dear Prof. Drauzio,  
 Thank you so much for this opportunity you gave me.  
 Thank you for bringing me all the way from Ghana to  
 be part of the ISFUS family.  
 IFBC & ISFUS 2022 was Great!

ITATIBIA WILL FOREVER REMAIN IN MY MIND & HEART  
 ALENE ALDER ANGEL (BEST MUM)  
 AMANDA ANGEL (BEST GRANNY)  
 KARLA (BEST SIS)  
 JOSIANE (BEST AUNTIE)  
 PERSILA & DOUGLAS (BEST 😊)

WITH LOVE Mavis ~~09/10/2022~~ 09/10/2022

Dear Alene,  
 Thank you so much for bringing me to your home!  
 You are wonderful!  
 With Gratitude & Love,  
 Mavis (09/10/2022)
